# Supplementary material for: Room-temperature spin-valve devices without spacer layers based on Fe3GaTe2 van der Waals homojunctions
Source: Royal Society of Chemistry journal article supplement (doi:10.1039/d4nr01767f), 2024-01-01
Supplement: d4nr01767f1.pdf [file d4nr01767f1.pdf]

**Supplementary Information of**  
**Room-temperature spin-valve devices without spacer layers based on**  
**Fe<sub>3</sub>GaTe<sub>2</sub> van der Waals homojunctions**

Yazhou Deng<sup>a, #</sup>, Kejia Zhu<sup>a, #</sup>, Mingjie Wang<sup>a</sup>, Tao Hu<sup>a</sup>, Yu Wang<sup>a</sup>, Bin Lei<sup>a, \*</sup>, and Xianhui  
Chen<sup>b, c, d, \*</sup>

<sup>a</sup> School of Physics and Optoelectronic Engineering, Anhui University, Hefei, Anhui 230601, China

<sup>b</sup> CAS Key Laboratory of Strongly-coupled Quantum Matter Physics, Department of Physics, University of Science and Technology of China, Hefei, Anhui 230026, China

<sup>c</sup> CAS Center for Excellence in Quantum Information and Quantum Physics, Hefei, Anhui 230026, China

<sup>d</sup> Collaborative Innovation Center of Advanced Microstructures, Nanjing University, Nanjing, Jiangsu 210093, China

<sup>#</sup> These authors contributed equally to this work.

<sup>\*</sup>Corresponding author. E-mails: leibin@ahu.edu.cn; chenxh@ustc.edu.cn.

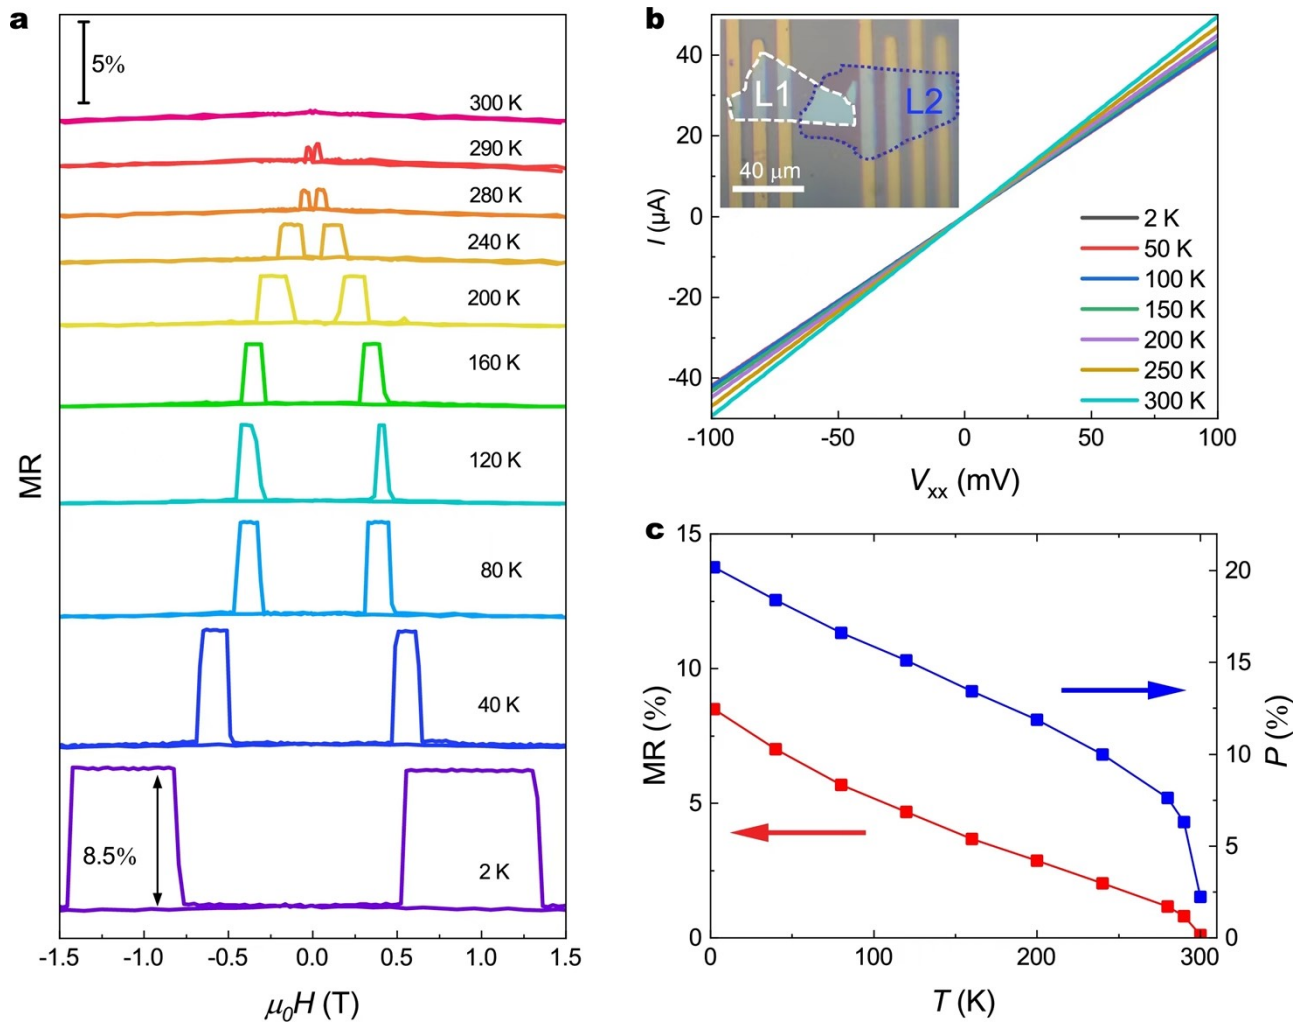

**Figure S1** (a) MR as functions of  $H$  at various temperatures ranging from 2 - 300 K (device S2). Obvious two-state MR behaviors are observed. (b)  $I$ - $V_{xx}$  characteristic curves at various temperatures, with the linear behavior indicating a favorable Ohmic contact of the device. The inset is an optical image of the  $\text{Fe}_3\text{GaTe}_2/\text{Fe}_3\text{GaTe}_2$  device. (c) Temperature-dependent MR and spin polarization  $P$ , both of which exhibit a decrease with rising temperature.

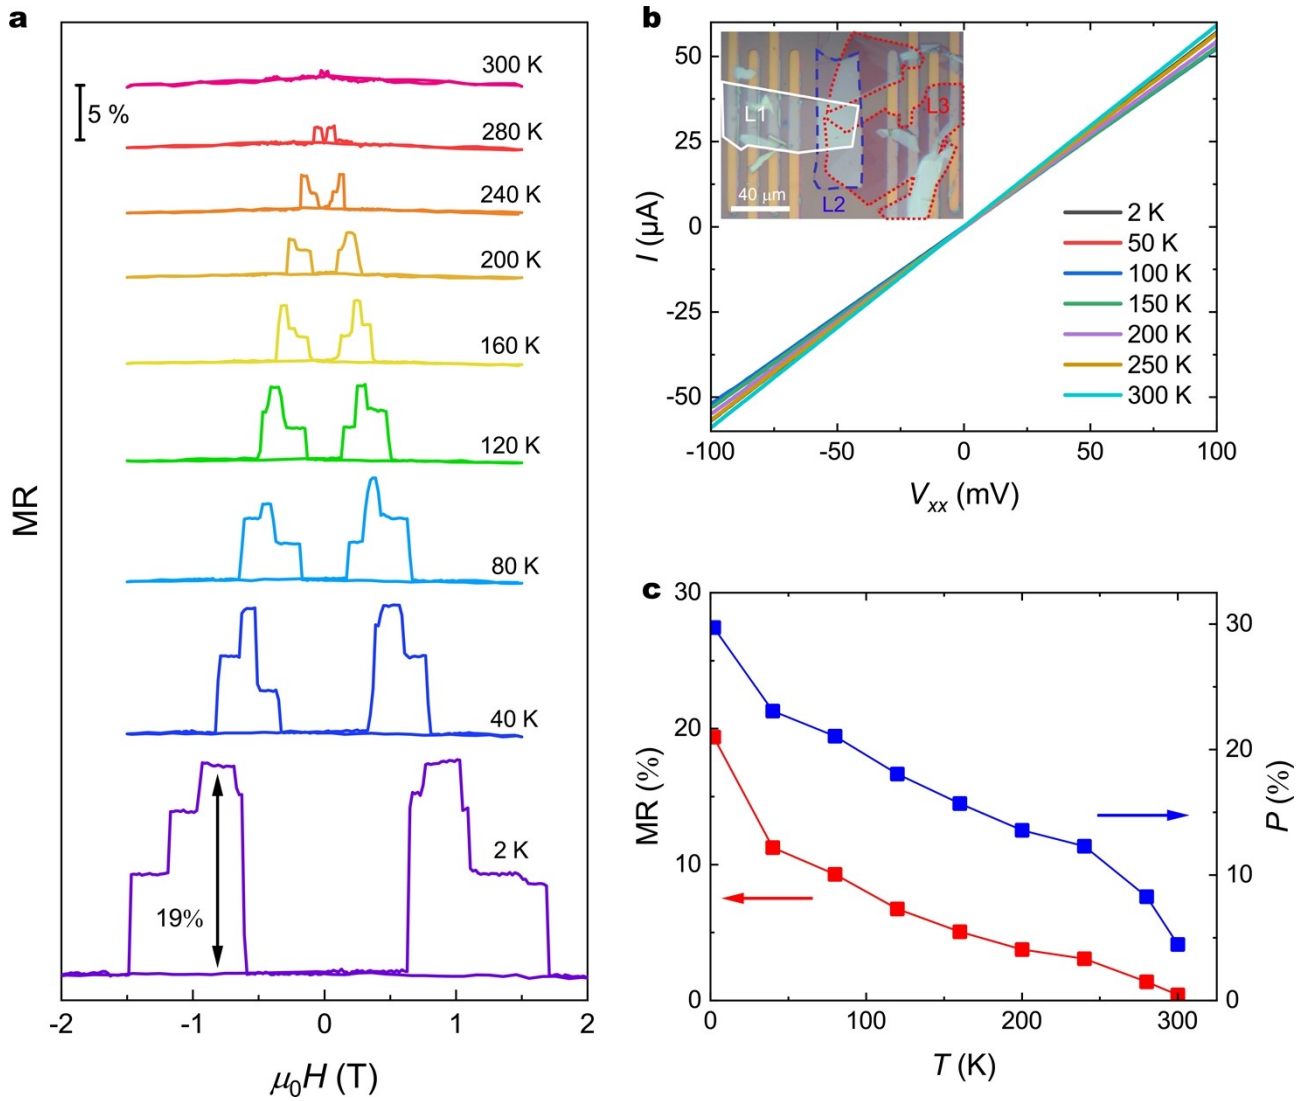

**Figure S2** (a) MR as functions of  $H$  at various temperatures ranging from 2 - 300 K (device S3). Obvious two-state MR behaviors are observed. (b)  $I-V_{xx}$  characteristic curves at various temperatures, with the linear behavior indicating a favorable Ohmic contact of the device. The inset is an optical image of the  $Fe_3GaTe_2/Fe_3GaTe_2/Fe_3GaTe_2$  device with the L3 flake splitting into two parts. (c) Temperature-dependent MR and spin polarization  $P$ , both of which exhibit a decrease with rising temperature.
